# Supplementary material
Source: PubMed Central journal article supplement (PMC3756687)
Supplement: NIHMS503789-supplement-Fig_S1.pdf [file NIHMS503789-supplement-Fig_S1.pdf]

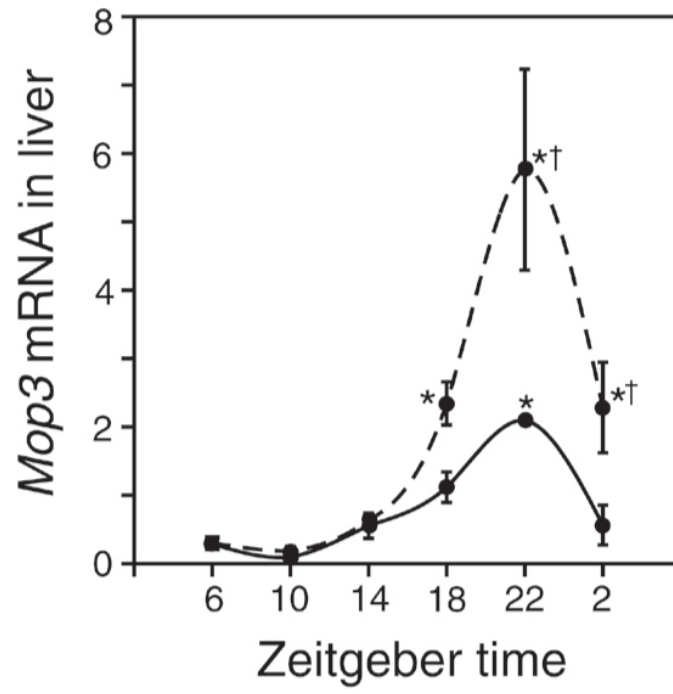

**Fig. S1**
