# Supplementary material
Source: PubMed Central journal article supplement (PMC3756687)
Supplement: NIHMS503789-supplement-Fig_S2.pdf [file NIHMS503789-supplement-Fig_S2.pdf]

### *Per1::luciferase* reporter assay

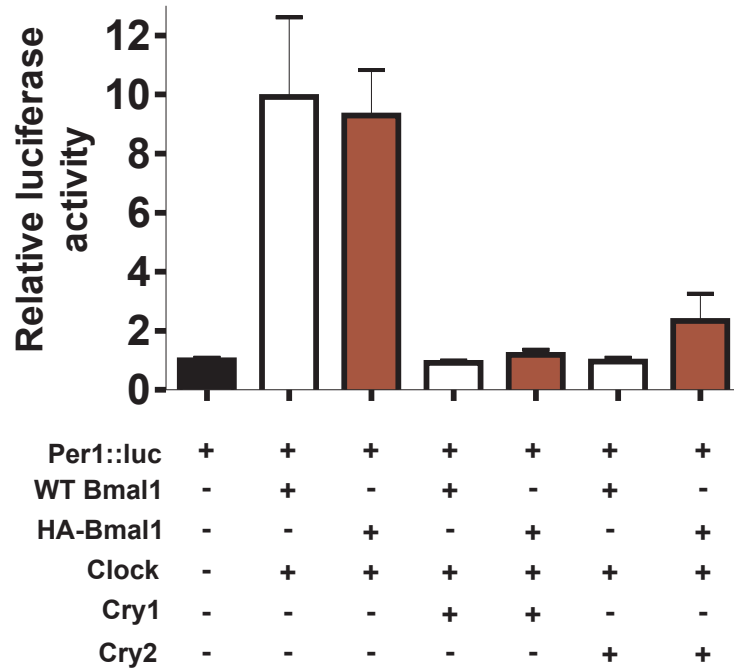

**Fig. S2**
