# Supplementary material
Source: PubMed Central journal article supplement (PMC3756687)
Supplement: NIHMS503789-supplement-Fig_S5.pdf [file NIHMS503789-supplement-Fig_S5.pdf]

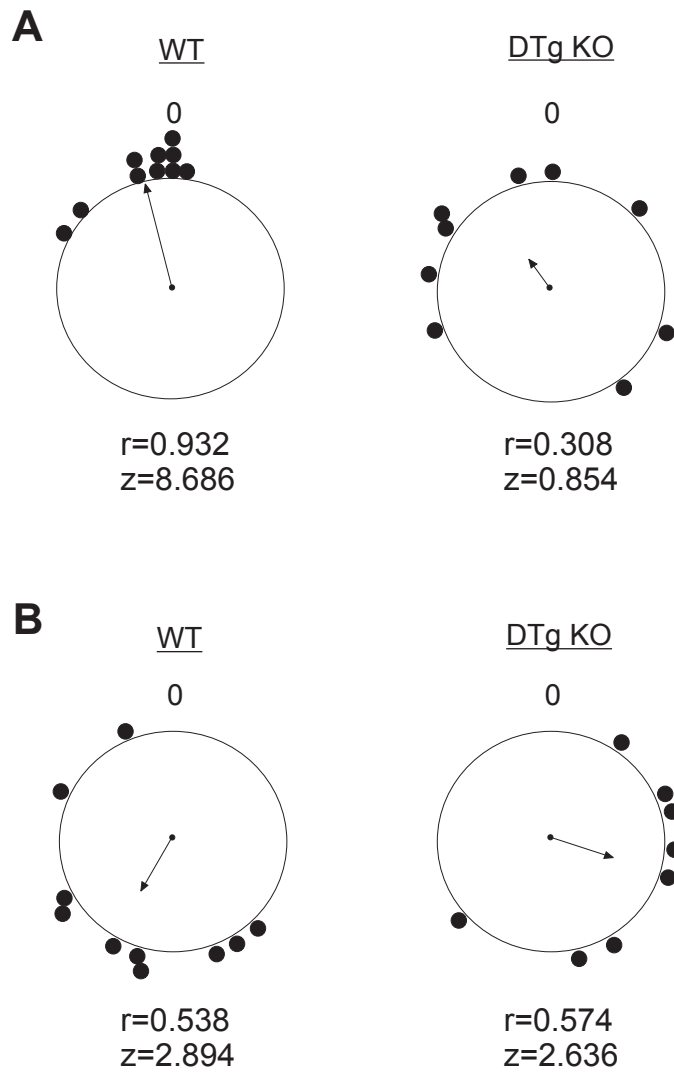

**Fig. S5**
