# Supplementary material
Source: PubMed Central journal article supplement (PMC3756687)
Supplement: NIHMS503789-supplement-Fig_S7.pdf [file NIHMS503789-supplement-Fig_S7.pdf]

**Brain line**

**A**

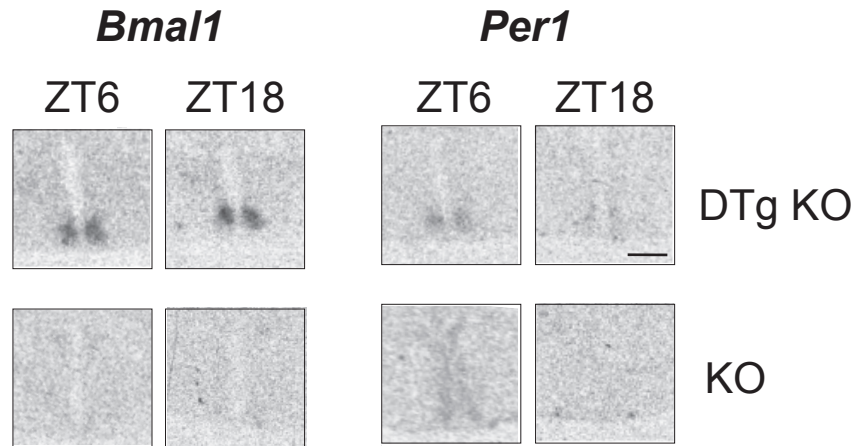

**B**

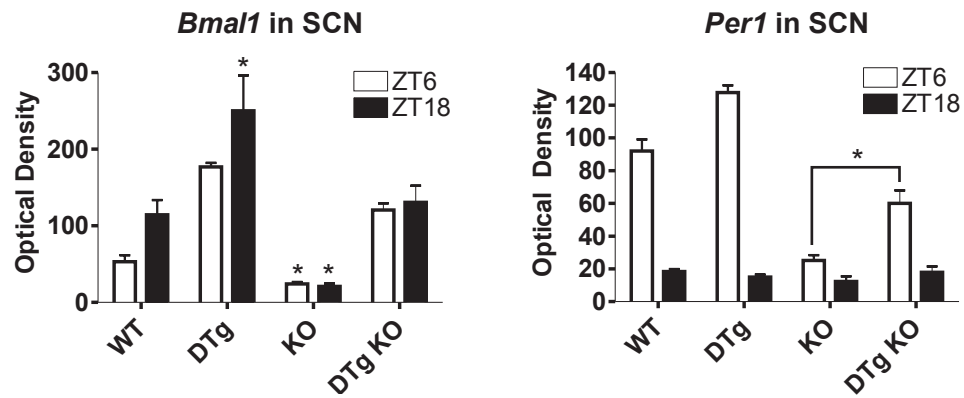

**Fig. S7**
