# Supplementary material
Source: PubMed Central journal article supplement (PMC3756687)
Supplement: NIHMS503789-supplement-Fig_S8.pdf [file NIHMS503789-supplement-Fig_S8.pdf]

## Muscle line

## Brain line

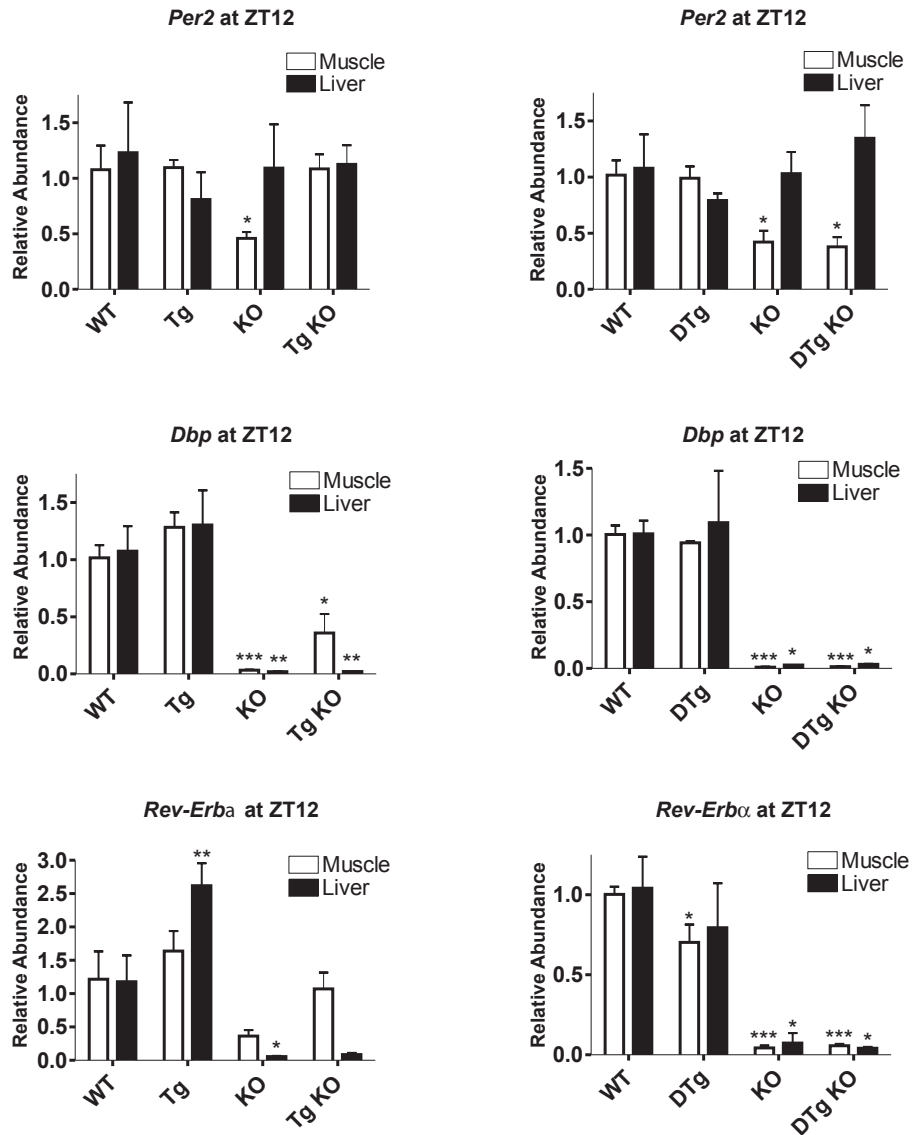

Fig. S8
